# Supplementary material for: A Novel Wall-Associated Kinase TaWAK-5D600 Positively Participates in Defense against Sharp Eyespot and Fusarium Crown Rot in Wheat
Source: MDPI journal article supplement (doi:10.3390/ijms24055060), 2023-03-06
Supplement: s1 [file s1]

**Supplementary material:** Fig. S1 The infection types of Sharp eyespot in BSMV: GFP and BSMV: TaWAK-5D600 wheat seedlings.

Fig. S2 The infection types of *Fusarium* Crown Rot in BSMV: GFP or BSMV: TaWAK-5D600 wheat plants.

Fig. S3 Variation of *TaWAK5D600* in natural population.

Fig. S4 Fragment used for BSMV: TaWAK-5D600 and off-target prediction by si-Fi software.

**Table S1.** Ka, Ks, and Ka/Ks values of all 140 TaWAK proteins.

**Table S2.** The pairwise protein sequence comparison between the TaWAK-5D600 and other diseases resistant WAK kinase proteins in crop plants.

**Table S3.** Primers used in this study.

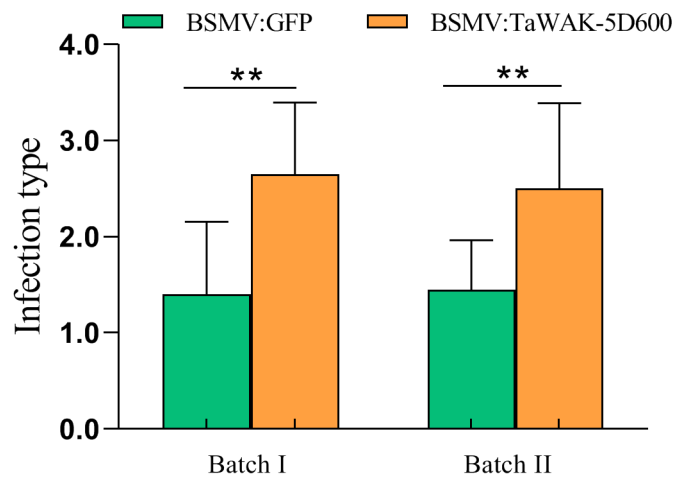

**Figure S1. The infection types of sharp eyespot in BSMV: GFP and BSMV: TaWAK-5D600 wheat seedlings.**

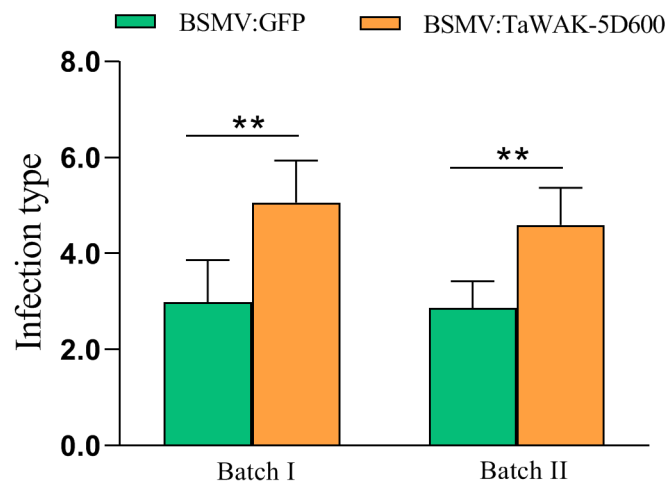

**Figure S2. The infection types of *Fusarium* Crown Rot in BSMV: GFP or BSMV: TaWAK-5D600 wheat plants.**

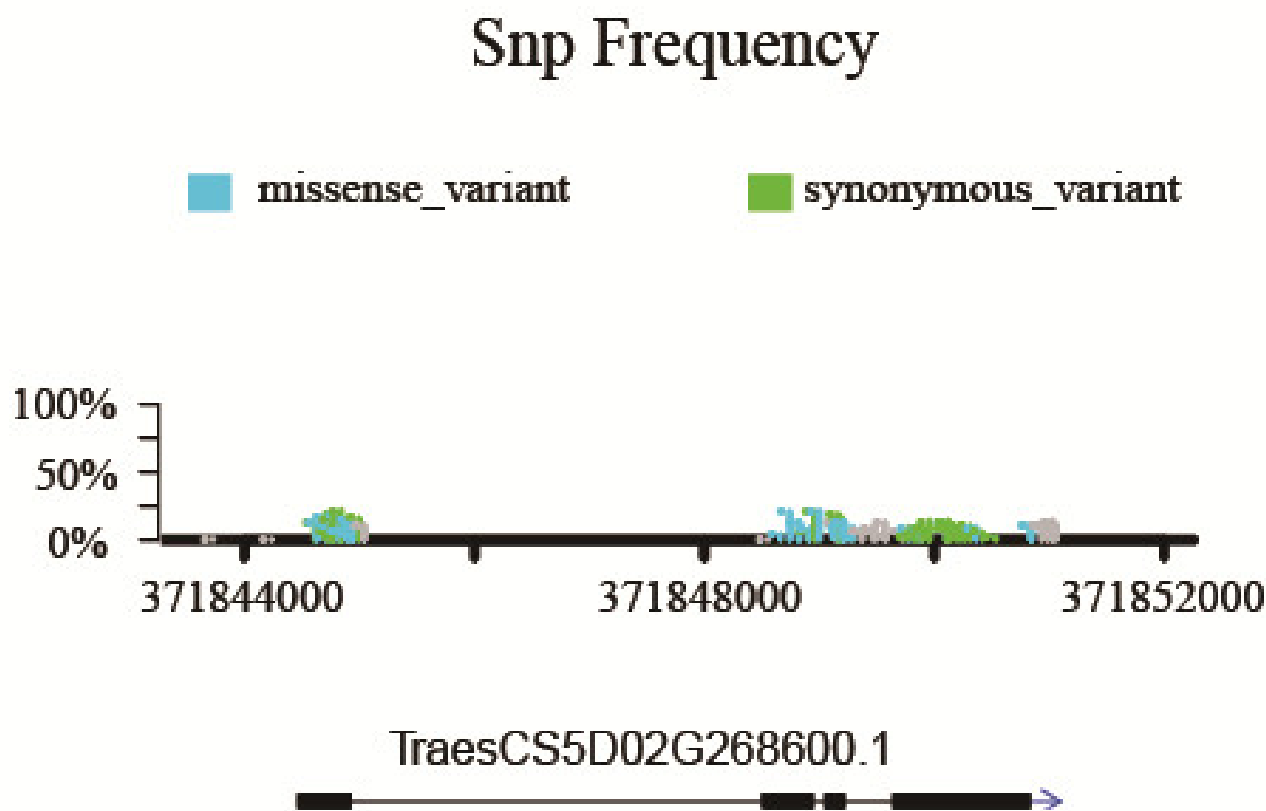

**Figure S3. Variation of *TaWAK5D600* in natural population**  
 ( <http://wheat.cau.edu.cn/WheatUnion>).

>VIGS-TaWAK-5D fragment (192 bp)

CATCCCGTTCCCGTACGGCGTCGGCAAGGAGTGC GCGTTACACGACGGCTTTAACCTCAACTGC  
 ACCACCGTGGAAGGCGTCGAGATGCCTCTTGCGGGGCATATCCAGGTGATTAAGATCTCTTTGGC  
 TAACTCCACAGCCACGTTGAATACCACGGCGATCTCGTGGAAGTGCTATCACCCAGCCACTGG

| Targets              | Total siRNA hits | Efficient siRNA hits |
|----------------------|------------------|----------------------|
| TraesCS5D02G268600.1 | 172              | 81                   |
| TraesCS5D02G256700.1 | 2                | 0                    |
| TraesCS5A02G249400.1 | 2                | 0                    |
| TraesCS5D02G256800.1 | 1                | 0                    |

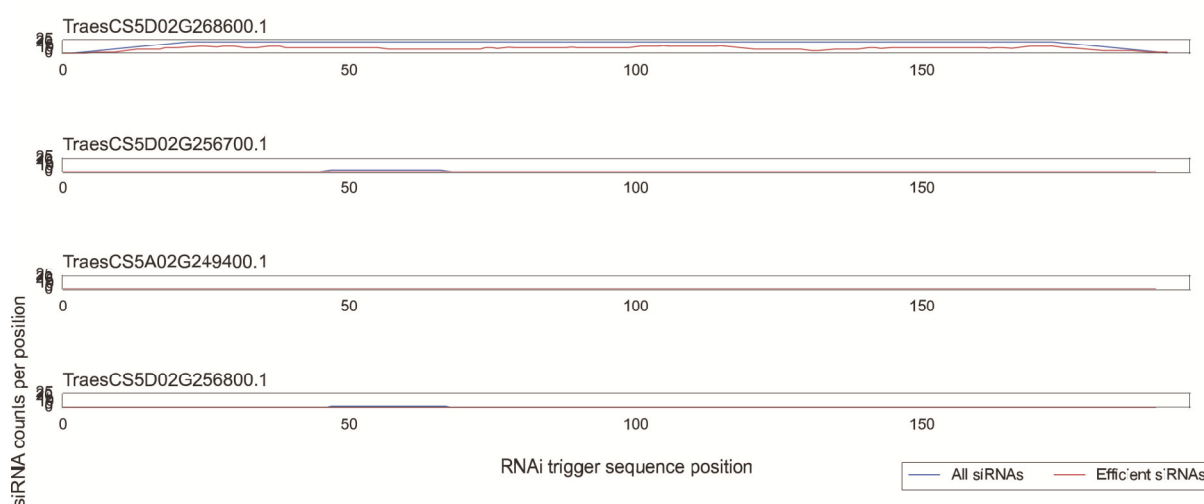

**Figure S4. Fragment used for BSMV: TaWAK-5D600 and off-target prediction by si-Fi software.**

**Table S1. Ka, Ks, and Ka/Ks values of all 140 *TaWAK* genes**

| Gene ID              | Molecular weight (kDa) | Isoelectric point (pI) | Amino acid sequences length (aa) |
|----------------------|------------------------|------------------------|----------------------------------|
| TraesCS2B02G059400.1 | 81.05                  | 7.77                   | 753                              |
| TraesCS2D02G046500.1 | 81.23                  | 6.89                   | 753                              |
| TraesCS6B02G073000.1 | 81.45                  | 7.07                   | 759                              |
| TraesCS6A02G054500.1 | 81.08                  | 7.27                   | 757                              |
| TraesCS6D02G056600.1 | 81.50                  | 7.22                   | 759                              |
| TraesCS2A02G047800.1 | 81.24                  | 8.12                   | 747                              |
| TraesCS2D02G045900.1 | 81.09                  | 7.98                   | 747                              |
| TraesCS5A02G365300.1 | 82.03                  | 6.5                    | 761                              |
| TraesCS5D02G373700.1 | 82.04                  | 7.17                   | 762                              |
| TraesCS5B02G366900.1 | 82.18                  | 6.74                   | 761                              |
| TraesCS6B02G059800.1 | 80.94                  | 6.12                   | 748                              |
| TraesCS6A02G043900.1 | 81.74                  | 6.39                   | 758                              |
| TraesCS6D02G050900.1 | 81.93                  | 6.08                   | 759                              |
| TraesCS6D02G046818.1 | 87.05                  | 8.38                   | 791                              |
| TraesCS1A02G340300.1 | 83.47                  | 7.12                   | 769                              |
| TraesCS1D02G342300.1 | 83.65                  | 7.08                   | 770                              |
| TraesCS1B02G352600.1 | 83.62                  | 7.62                   | 771                              |
| TraesCS7D02G463600.1 | 84.16                  | 5.45                   | 769                              |
| TraesCS5B02G367600.1 | 83.49                  | 6.63                   | 761                              |
| TraesCS7A02G242800.1 | 80.87                  | 6.1                    | 744                              |
| TraesCS7B02G148800.1 | 81.38                  | 6.09                   | 747                              |
| TraesCS7A02G242900.1 | 82.97                  | 5.84                   | 752                              |
| TraesCS7B02G148700.1 | 82.78                  | 6.12                   | 751                              |
| TraesCS5D02G330900.1 | 83.47                  | 6.61                   | 750                              |
| TraesCS5A02G323900.1 | 84.28                  | 6.2                    | 761                              |
| TraesCS5B02G324500.1 | 84.16                  | 6.7                    | 760                              |
| TraesCS5B02G324400.1 | 78.70                  | 6.63                   | 714                              |
| TraesCS5A02G323800.1 | 78.88                  | 6.9                    | 716                              |
| TraesCS5D02G330600.1 | 79.29                  | 6.94                   | 717                              |
| TraesCS2B02G464000.1 | 80.33                  | 6.72                   | 739                              |
| TraesCS2A02G442900.1 | 81.08                  | 7.36                   | 742                              |
| TraesCS2D02G442000.1 | 80.94                  | 7.35                   | 742                              |
| TraesCS6B02G040700.1 | 81.63                  | 5.26                   | 737                              |
| TraesCS6D02G032300.1 | 81.42                  | 5.18                   | 737                              |
| TraesCS3A02G006900.1 | 82.51                  | 4.89                   | 759                              |
| TraesCS3D02G003900.1 | 82.80                  | 5.92                   | 760                              |

|                      |       |      |     |
|----------------------|-------|------|-----|
| TraesCS5A02G261200.1 | 82.34 | 6.41 | 743 |
| TraesCS5B02G259500.1 | 81.84 | 6.62 | 739 |
| TraesCS5D02G268600.1 | 82.02 | 6.15 | 743 |
| TraesCS5A02G249600.1 | 81.63 | 7.54 | 736 |
| TraesCS5D02G256800.1 | 81.51 | 7.79 | 736 |
| TraesCS5A02G249300.1 | 83.92 | 4.89 | 760 |
| TraesCS5B02G247400.1 | 81.89 | 5.52 | 744 |
| TraesCS5D02G256700.1 | 81.29 | 5.74 | 737 |
| TraesCS6B02G256300.1 | 84.16 | 5.61 | 757 |
| TraesCS6A02G225300.1 | 84.02 | 5.61 | 757 |
| TraesCS6D02G210100.1 | 84.17 | 5.89 | 757 |
| TraesCS6A02G075500.1 | 82.23 | 6.28 | 739 |
| TraesCS6B02G101400.1 | 81.57 | 5.77 | 736 |
| TraesCS6A02G027400.1 | 81.58 | 6.87 | 732 |
| TraesCS1D02G037200.1 | 82.10 | 6.09 | 745 |
| TraesCS7D02G136700.1 | 82.21 | 6.18 | 745 |
| TraesCS1A02G035700.1 | 82.16 | 6.14 | 745 |
| TraesCS1B02G009600.1 | 83.33 | 6.61 | 756 |
| TraesCS2D02G377900.1 | 82.37 | 6.39 | 742 |
| TraesCS2A02G381500.1 | 82.10 | 5.17 | 743 |
| TraesCS2D02G378000.1 | 79.69 | 6.32 | 718 |
| TraesCS2B02G489700.1 | 82.28 | 6.56 | 743 |
| TraesCS2B02G580400.1 | 82.48 | 7.06 | 744 |
| TraesCS2D02G550900.1 | 82.28 | 6.82 | 744 |
| TraesCS5A02G274100.1 | 76.88 | 7.31 | 714 |
| TraesCS5D02G281200.1 | 76.81 | 7.01 | 713 |
| TraesCS6A02G376500.1 | 85.01 | 7.23 | 764 |
| TraesCS6B02G414200.1 | 85.06 | 6.54 | 765 |
| TraesCS6D02G361700.1 | 84.85 | 6.58 | 763 |
| TraesCS6B02G413700.1 | 81.60 | 6.71 | 737 |
| TraesCS6D02G361000.1 | 84.19 | 6.85 | 759 |
| TraesCS6A02G376005.1 | 83.84 | 6.07 | 759 |
| TraesCS6A02G376000.1 | 82.59 | 7.88 | 749 |
| TraesCS6D02G361100.1 | 81.80 | 8.02 | 742 |
| TraesCS6A02G376200.1 | 82.22 | 6.1  | 754 |
| TraesCS6D02G361400.1 | 82.21 | 6.1  | 754 |
| TraesCS6B02G414000.1 | 82.68 | 6.17 | 757 |
| TraesCS6A02G377500.1 | 82.83 | 6.13 | 756 |
| TraesCS6D02G362100.1 | 82.62 | 6.34 | 756 |
| TraesCS6A02G377600.1 | 83.59 | 5.84 | 761 |
| TraesCS6B02G415100.1 | 83.88 | 5.77 | 763 |
| TraesCS6D02G362200.1 | 83.62 | 6.5  | 761 |

|                      |              |             |            |
|----------------------|--------------|-------------|------------|
| TraesCS5B02G521800.1 | 83.95        | 5.94        | 761        |
| TraesCS5D02G520600.1 | 83.85        | 6.31        | 761        |
| TraesCS1A02G012000.1 | 82.89        | 6.75        | 743        |
| TraesCS1D02G010100.1 | 83.05        | 6.11        | 744        |
| TraesCS1A02G011900.1 | 83.31        | 6.88        | 746        |
| TraesCS1B02G050100.1 | 75.05        | 7.7         | 683        |
| TraesCS6B02G010600.1 | 74.86        | 7.47        | 683        |
| TraesCS2A02G071900.1 | 78.94        | 7.79        | 720        |
| TraesCS2B02G087300.1 | 78.93        | 7.32        | 719        |
| TraesCS5B02G363100.1 | 81.64        | 5.66        | 738        |
| TraesCS5D02G477400.1 | 78.27        | 6.79        | 705        |
| TraesCS1A02G017700.1 | 75.44        | 6.95        | 681        |
| TraesCS1B02G021800.1 | 72.73        | 6.61        | 661        |
| TraesCS1D02G016200.1 | 74.93        | 5.59        | 683        |
| TraesCS1B02G075700.1 | 74.81        | 6.62        | 684        |
| TraesCS1A02G058200.1 | 73.83        | 6.58        | 681        |
| TraesCS1D02G058800.1 | 74.11        | 6.49        | 683        |
| TraesCS2A02G093100.1 | 74.23        | 6.29        | 675        |
| TraesCS4D02G042300.1 | 78.10        | 6.87        | 709        |
| TraesCS4D02G042400.1 | 77.96        | 6.62        | 709        |
| TraesCS6D02G001400.1 | 77.75        | 6.62        | 705        |
| TraesCS6B02G009100.1 | 69.53        | 6.54        | 627        |
| TraesCS2B02G563800.1 | 77.61        | 8.55        | 702        |
| TraesCS7A02G565200.1 | 81.19        | 6.85        | 732        |
| TraesCS7D02G545900.1 | 81.25        | 6.24        | 732        |
| TraesCS2D02G002600.1 | 79.70        | 6.37        | 714        |
| TraesCS3A02G533100.1 | 79.84        | 7.05        | 716        |
| TraesCS3B02G595500.1 | 80.06        | 6.71        | 720        |
| TraesCS7A02G062000.1 | 80.77        | 6.01        | 741        |
| TraesCS6D02G395400.1 | 82.65        | 6.1         | 750        |
| TraesCS6D02G395900.1 | 82.33        | 6.25        | 741        |
| TraesCS3B02G098900.1 | 83.98        | 6.79        | 752        |
| TraesCS2B02G563900.1 | 79.45        | 6.76        | 724        |
| TraesCS6A02G061200.1 | 79.59        | 6.54        | 733        |
| TraesCS6D02G063400.1 | 79.18        | 6.21        | 728        |
| TraesCS5B02G458300.1 | 72.91        | 7.27        | 676        |
| TraesCS5A02G445700.1 | 77.86        | 5.75        | 719        |
| TraesCS5B02G454100.1 | 78.60        | 6.3         | 723        |
| TraesCS5B02G452300.1 | 77.89        | 5.59        | 718        |
| TraesCS5B02G454700.1 | 77.97        | 5.74        | 718        |
| TraesCS2A02G381400.1 | <b>82.23</b> | <b>6.2</b>  | <b>742</b> |
| TraesCS6B02G100300.1 | <b>81.93</b> | <b>5.94</b> | <b>739</b> |

|                      |       |      |     |
|----------------------|-------|------|-----|
| TraesCS6A02G225400.1 | 82.2  | 5.84 | 757 |
| TraesCS6B02G256200.1 | 71.19 | 8.66 | 653 |
| TraesCS6D02G210200.1 | 82.32 | 6.16 | 755 |
| TraesCS6B02G413900.1 | 85.22 | 6.45 | 765 |
| TraesCS2A02G047600.1 | 81.1  | 7.25 | 753 |
| TraesCS4A02G351700.1 | 83.81 | 6.13 | 761 |
| TraesCS2D02G070600.1 | 77.61 | 7.53 | 712 |
| TraesCS2A02G071800.1 | 77.9  | 7    | 716 |
| TraesCS1A02G016300.1 | 75.21 | 5.3  | 683 |
| TraesCS1D02G014900.1 | 75.07 | 5.91 | 683 |
| TraesCS1B02G020200.1 | 75.17 | 5.91 | 683 |
| TraesCS1D02G016800.1 | 75.51 | 6.34 | 687 |
| TraesCS6B02G015800.1 | 75.65 | 7.03 | 686 |
| TraesCS5A02G464700.1 | 78.5  | 7.08 | 711 |
| TraesCS5A02G052900.1 | 76.71 | 7.93 | 688 |
| TraesCS5B02G063600.1 | 76.47 | 7.21 | 690 |
| TraesCS2B02G231700.1 | 80.24 | 6.55 | 725 |
| TraesCS6B02G055400.1 | 77.09 | 6.83 | 705 |
| TraesCS2B02G151900.1 | 81.68 | 7.01 | 744 |
| TraesCS5B02G455500.1 | 78.06 | 6.74 | 718 |



**Table S2. The pairwise protein sequence comparison between the TaWAK-5D600 and other disease resistant WAK kinase proteins in crop plants.**

| <b>Gene name</b>  | <b>Gene ID</b>       | <b>Disease name</b>                    | <b>Identity with TaRLK-5D600</b> |
|-------------------|----------------------|----------------------------------------|----------------------------------|
| ZmWAK-RLK1 (Htn1) | AKP45154.1           | northern corn leaf blight              | 20%                              |
| ZmWAK-qHSR1       | AIY68255.1           | maize smut                             | 27.05%                           |
| OsWAK-Xa4         | KU761313.1           | rice blast                             | 28.25%                           |
| OsWAK1            | Os01t0136400_01      | rice blast                             | 24.50%                           |
| OsWAK91           | Os09t0561600_01      | rice blast                             | 31.06%                           |
| OsWAK92           | Os09t0562600_01      | rice blast                             | 33.37%                           |
| OsWAK14           | Os02t0632800_01      | rice blast                             | 14.49%                           |
| TaWAKL4-Stb6      | TraesCS3A02G049500.2 | Septoria tritici blotch                | 20.21%                           |
| TaWAK2A-800       | TraesCS2A02G071800.1 | Sharp eyespot and Fusarium head blight | 33.33%                           |
| TaWAK6            | TraesCS5B02G063600.1 | leaf rust                              | 32.63%                           |
| TaWAK-6D          | TraesCS6D02G210200.1 | Sharp eyespot and Fusarium crown rot   | 49.68%                           |
| TaWAK-7D          | TraesCS7D02G087000.1 | Sharp eyespot                          | 40.65%                           |

**Table S3. Primers used in this study.**

| Primer name      | Sequence                                              | Useage                      |
|------------------|-------------------------------------------------------|-----------------------------|
| VIGS-TaWAK5DF    | 5'-TAC <u>GCTAGCC</u> ATCCCGTTCCCGTACGG-3'            | Primer for<br>BSMV-VIGS     |
| VIGS-TaWAK5DR    | 5'-GAC <u>GCTAGCCC</u> AGTGGCTGGGTGATAG3'             |                             |
| BSMV-CPF         | 5'-TGA CTGCTAAGGGTGGAGGA-3'                           | Primer for CP gene          |
| BSMV-CPR         | 5'-CGGTTGAACATCACGAAGAGT-3'                           |                             |
| TaActin-RTF      | 5'-CGTCCATGATCCCTCCGAATT-3'                           | Primer for RT-qPCR          |
| TaActin-RTR      | 5'-CTCCATGTCATCCCAGTTG-3'                             |                             |
| TaWAK-5DRTF      | 5'-CCTTTCAGTGATTGCGGC-3'                              |                             |
| TaWAK-5DRTR      | 5'-CGGTGGTGCAGTTGAGGTTA-3'                            |                             |
| TaSERK1-RTF      | 5'-TGGCAGTGCATAGGAACCTG-3'                            |                             |
| TaSERK1-RTR      | 5'-CCCAGTGCAATCCGAGTTCT-3'                            |                             |
| TaMPK3-RTF       | 5'-TACATGAGGCACCTGCCGCAGT-3'                          |                             |
| TaMPK3-RTR       | 5'-GGTTCAACTCCAGGGCTTCGTTG-3'                         |                             |
| TaChitinase3-RTF | 5'-CCCACCCTAACCTGAGCATC-3'                            |                             |
| TaChitinase3-RTR | 5'-ACTGGTTGATCATGGCGGAG-3'                            |                             |
| TaChitinase4-RTF | 5'-GAAGTCCCCCATGGCGATC-3'                             |                             |
| TaChitinase4-RTR | 5'-GGTCCCGCAATAACCGTACT-3'                            |                             |
| TaPR1-RTF        | 5'-AAACAGCAGCAACCCAAGAA-3'                            |                             |
| TaPR1-RTR        | 5'-GGGTCCAGTAGCACCGATTTA-3'                           |                             |
| GFP-TaWAK-5D     | 5'- GCCGGGGCAGCGGAATTCATGACGAAGCTGAGGTATTC-3'         | subcellular<br>localization |
| GFP-TaWAK-5D     | 5'-<br>GATTTGAGCGTACCGAATTCTCAACGCCCTGATTGCAGATTTG-3' | subcellular<br>localization |
